# Supplementary material for: Impact of CYP3A4*22 on Pazopanib Pharmacokinetics in Cancer Patients
Source: Springer Nature journal article supplement (doi:10.1007/s40262-018-0719-5), 2018-10-27
Supplement: MOESM3 [file 16230224]

suppl file model (1).txt

\$PROBLEM PROJECT PAZOPANIB PK model  
;UNITS: TAD=hour, Concentration=MG/L

\$INPUT ID DOSE TIME DV DAY TAD PKDAY MDV EVID AMT CMT SS II RATE ICLI IKENZ  
IIC50 IVI CYP3 IGN  
;RATE : infusion rate ifosfamide  
;ICLI : Clearance ifosfamide  
;IKENZ :rate constant for enzyme degradation  
;IIC50 : ifosfamide concentration at 50% of maximum inhibition  
;IVI : Volume of distribution ifosfamide  
;CYP3 : CYP3A4\*22 carriers =1 and non carriers = 0.

\$DATA pazopanib.csv  
IGNORE=(IGN.EQ.1)

\$SUBROUTINE ADVAN6 TRANS1 TOL=4

\$MODEL  
COMP=(DEPSN) ; 1 paz DOSE1  
COMP=(CENTSN,DEFOBS) ; 2 paz Central  
COMP=(PAZG2) ; 3 paz DOSE2  
COMP=(IFO) ; 4 ifo central  
COMP=(ENZ) ; 5 ifo enz  
COMP=(PERIPH) ; 6 paz peripheral

\$PK  
FL1=0  
IF(CYP3.EQ.1) FL1=1  
IF(CYP3.EQ.2) FL1=1

IF(PKDAY.EQ.1) IOV1=ETA(9)  
IF(PKDAY.EQ.2) IOV1=ETA(10)  
IF(PKDAY.EQ.3) IOV1=ETA(11)

CL = THETA(1)\*EXP(ETA(1))\* THETA(13)\*\*FL1  
V2 = THETA(2)\*EXP(ETA(2))  
KA1 = THETA(3)\*EXP(ETA(3))  
KA2 = THETA(4)\*EXP(ETA(4))  
ALAG3= THETA(5)\*EXP(ETA(5))  
Q24 = THETA(6)  
V4 = THETA(7)\*EXP(ETA(6))

KM = THETA(8)  
VMAX = THETA(9)  
LAMBDA=THETA(11)/24  
DCRP = THETA(12)  
TVB = (1-(DOSE-200)\*VMAX/(KM+DOSE-200)) ; dose-dependent F  
TVF1 = 1-DCRP+DCRP\*EXP(-LAMBDA\*TIME) ; time-dependent F  
TVF = TVB\*TVF1\*EXP(ETA(7)+IOV1)

suppl file model (1).txt

TVFR = THETA(10)\*EXP(ETA(8))  
F1 = TVFR/(1+TVFR)\*TVF ; fraction of fast abs  
together with F  
F3 = TVF-F1 ; fraction of  
slow abs together with F

K20 = CL/V2  
K26 = Q24/V2  
K62 = Q24/V4  
S2 = V2

;-----EBE of IFO-----

CLI = ICLI  
KENZ = IKENZ  
IC50I= IIC50  
VI = IVI  
K40 = CLI/VI  
S4 = VI  
A\_0(5)=1

\$DES

CPI=A(4)/VI  
DADT(1)=-KA1\*A(1)  
DADT(2)=KA1\*A(1)+KA2\*A(3)-K20\*A(5)\*A(2)-K26\*A(2)+K62\*A(6)  
DADT(3)=-KA2\*A(3)  
DADT(6)=K26\*A(2)-K62\*A(6)

DADT(4)=-K40\*A(5)\*A(4)  
DADT(5)=KENZ-KENZ\*A(5)\*(1-CPI/(CPI+IC50I))

\$ERROR

ENZ=A(5)  
TY=F  
IF(F.LT.0.001) TY=0.001  
IPRED = TY  
Y=IPRED\*(1+ERR(1))+ERR(2)  
IRES = DV-IPRED  
IWRES = IRES/IPRED

\$THETA

(0,1) ; 1 CL  
(0,2) ; 2 V2  
(0,0.9) ; 3 KA1  
(0,0.05); 4 KA2  
(0,1.4) ; 5 ALAG3  
(0,1) ; 6 Q24  
(0,20) ; 7 V4  
(0,200) ; 8 KMDOSE  
(1 FIX) ; 9 VMAXDOSE

suppl file model (1).txt

(0,0.5) ; 10 TVFR  
(0, 0.1); 11 LAMBDA  
(0, 0.3); 12 DCRP  
(0, 0.8); 13 CYP3

\$OMEGA

0.5 ; 1 CL  
0 FIX ; 2 V2  
0.5 ; 3 KA1  
0 FIX ; 4 KA2  
0 FIX ; 5 ALAG3  
0.5 ; 6 V4  
0.5 ; 7 F  
0 FIX ; 8 TVFR

\$OMEGA BLOCK(1) 0.5 ; IOV F  
\$OMEGA BLOCK(1) SAME  
\$OMEGA BLOCK(1) SAME

\$SIGMA

0.05 ; prop paz  
2 ; add paz

\$ESTIMATION METHOD=1 INTER NOABORT MAXEVAL=9999 SIG=3 PRINT=1 POSTHOC  
MSFO=ms-f001  
\$COVARIANCE PRINT=E MATRIX=S

\$TABLE ID TIME TAD DOSE DAY PKDAY CMT DV CWRES WRES IPRED PRED NOPRINT ONEHEADER  
FILE=sdtab001
